# Supplementary material for: Influence of semi-volatile aerosols on physical and optical properties of aerosols in the Kathmandu Valley
Source: Copernicus journal article supplement (doi:10.5194/acp-2017-287), 2017-04-26
Supplement: Supplementary file 1 [file acp-2017-287-supplement.pdf]

1 *Supplement of*

2 **Influence of semi-volatile aerosols on physical and optical**  
3 **properties of aerosols in the Kathmandu Valley**

4 **Sujan Shrestha<sup>1,2</sup>, Siva Praveen Puppala<sup>1</sup>, Bhupesh Adhikary<sup>1</sup>, Kundan Lal Shrestha<sup>2</sup>,**  
5 **Arnico K. Panday<sup>1</sup>**

6 *Correspondence to:* Siva Praveen Puppala (SivaPraveen.Puppala@icimod.org) and Sujan Shrestha  
7 (Sujan.Shrestha@icimod.org and sujanshrestha101@gmail.com)

8  
9  
10  
11  
12  
13  
14  
15  
16  
17  
18  
19  
20  
21  
22  
23  
24  
25

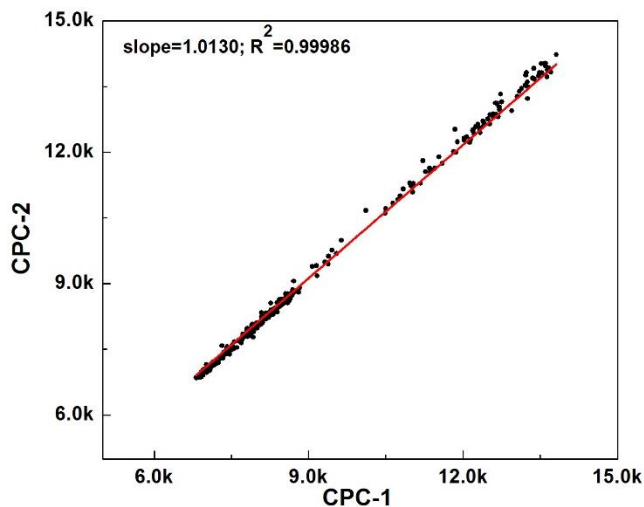

26  
 27 **Fig. S1. (a)** Comparison of collocated CPC particle concentration (CPC-1 and CPC-2 indicate the particle  
 28 concentration ( $\#/cm^3$ ) measured in individual CPC instruments)  
 29

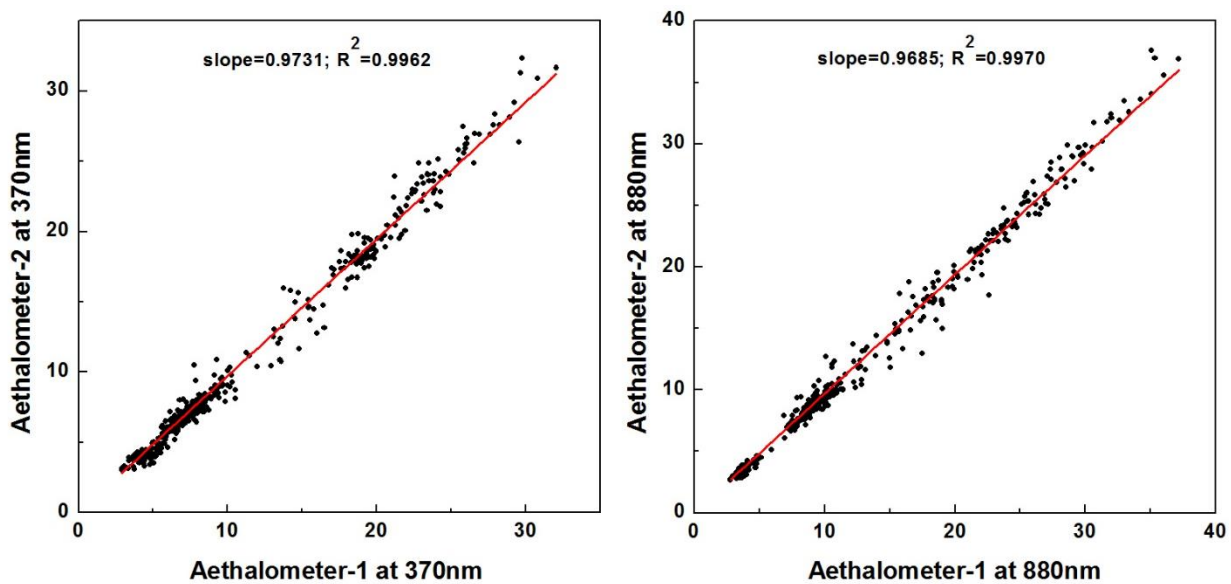

30  
 31 **Fig. S1. (b)** Comparison of collocated Aethalometers black carbon concentration at 880 and 370nm (Aethalometer-1  
 32 and Aethalometer-2 indicate the black carbon concentration ( $\mu g/m^3$ ) measured in individual Aethalometers).

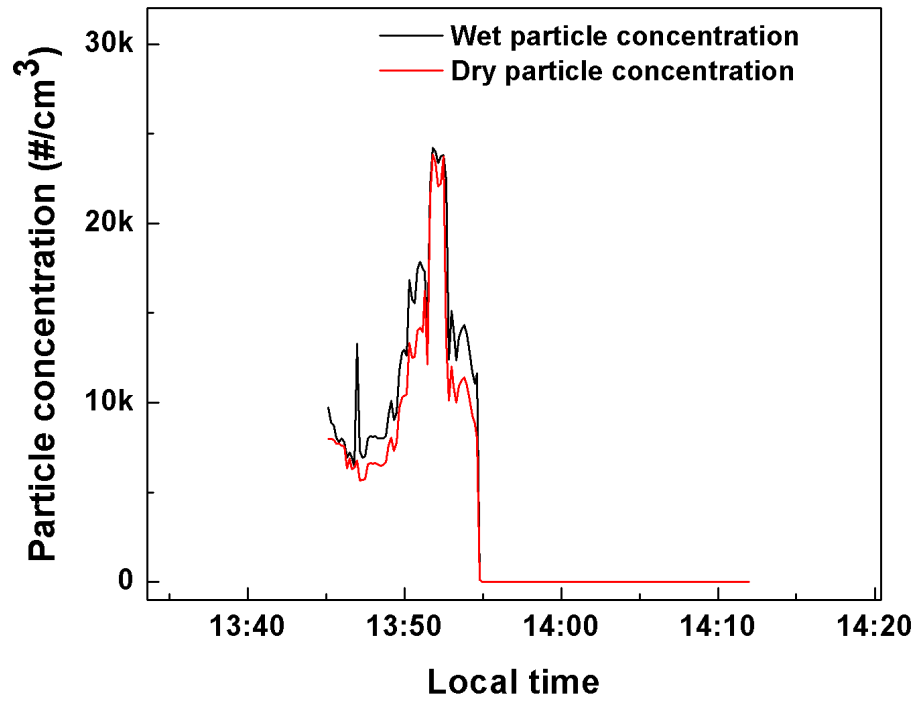

33

34 **Fig. S2.** Leakage test conducted with CPC showing number concentration abruptly decreased to zero value in both  
35 instruments sampling wet and dry sample when HEPA filter is placed.

36

37

38

39

40

41

42

43

44

45

46

47

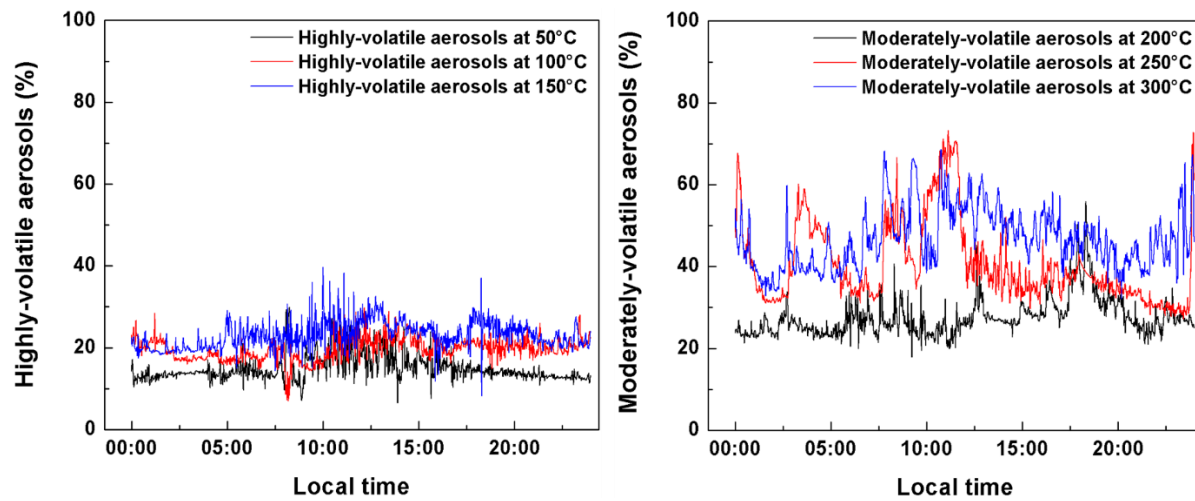

48

49 **Fig. S3.** Diurnal variation of highly-volatile and moderately volatile aerosols.

50
